# Supplementary material
Source: PubMed Central journal article supplement (PMC5192007)
Supplement: NIHMS790995-supplement-01.pdf [file NIHMS790995-supplement-01.pdf]

| <b>System</b>                   | <b>Variable</b>             |
|---------------------------------|-----------------------------|
| <b>Skin</b>                     | TELANGIECTASIA              |
|                                 | NASAL ULCERS                |
|                                 | ORAL ULCERS                 |
|                                 | RAYNAUD                     |
|                                 | SKIN HAND SWELLING HISTORY  |
|                                 | SKIN HAND SWELLING OBSERVED |
|                                 | SCLERODACTYLY               |
|                                 | PITTING                     |
|                                 | ALOPECIA                    |
|                                 | MALAR RASH                  |
|                                 | DISCOID RASH                |
|                                 | SKIN RASH                   |
|                                 | PHOTOSENSITIVITY            |
|                                 | CALCINOSIS                  |
|                                 | PROXIMAL SCLERODERMA        |
|                                 | SICCA                       |
|                                 | <b>Muscle</b>               |
| MYALGIA                         |                             |
| ARTHRALGIA                      |                             |
| OBSERVED PROXIMAL WEAKNESS      |                             |
| HISTORY PROXIMAL WEAKNESS       |                             |
| MUSCULAR HAND SWELLING SPECIFIC |                             |
| MUSCULAR HAND SWELLING GENERAL  |                             |
| MUSCULAR HAND SWELLING HISTORY  |                             |
| MUSCULAR HAND SWELLING OBSERVED |                             |
| <b>Joints</b>                   | AVASCULAR NECROSIS          |
|                                 | MORNING STIFF               |
|                                 | JOIN TENDER                 |
|                                 | SYNOVITYS                   |
|                                 | JOIN SWELLING HISTORY       |
|                                 | JOIN SWELLING OBS           |
|                                 | SWELLING JOINTS > 3         |
|                                 | SYMMETRIC SWELLING          |
|                                 | JOINTS PAIN                 |
|                                 | JOINTS DEFORMITY            |
|                                 | RHEUM NODULE                |
| <b>Lymph nodes</b>              | ANY LYMPHADENOPATHY         |
|                                 | LYMPNODES SWELLING          |
|                                 | NECK LYMPNODE SWELLIN       |
|                                 | AXILA LYMPNODE SWELLIN      |

|                        |                               |
|------------------------|-------------------------------|
|                        | GROIN LYMPHNODE SWELLING      |
| <b>Gastro</b>          | GASTRIC REFLUX                |
| <b>Blood</b>           | ANEMIA                        |
|                        | ANEMIA HEMOLYTIC              |
|                        | LEUKOPENIA                    |
|                        | LYMPHOPENIA                   |
|                        | THROMBOPENIA                  |
|                        | THROMBOSIS                    |
| <b>Heart</b>           | PLEURITIS                     |
|                        | PERICARDITIS                  |
|                        | PLEURITIS and/or PERICARDITIS |
|                        | VENOUS CLOT                   |
|                        | ARTERIAL CLOT                 |
|                        | ANY CLOT                      |
|                        | MYOCARD INFARCTION            |
|                        | VALVULAR DISEASE              |
|                        | VALVULAR DISEASE SITE         |
|                        | NUMB VALVULAR                 |
| <b>Lung</b>            | PULMONARY HYPERTENSION        |
|                        | PULMONARY VASCULAR LESION     |
|                        | PULMONARY FIBROSIS            |
|                        | EVIDENCE OF LUNG DISEASE      |
| <b>Kidney</b>          | EVIDENCE OF RENAL DISEASE     |
|                        | RENAL CELL CAST               |
|                        | RENAL PROTEINURIA             |
|                        | RENAL HEMATURIA               |
|                        | RENAL CLOT                    |
|                        | RENAL ARTERY STENOSIS         |
| <b>Neuro</b>           | SEIZURE                       |
|                        | PSYCHOSIS                     |
|                        | NEUROPATHY                    |
|                        | NEUROPSYCHIATRIC              |
|                        | STROKE                        |
|                        | CHOREA                        |
| <b>Metabolic Panel</b> | GLUCOSE                       |
|                        | UREANITROGEN (BUN)            |
|                        | CREATINE                      |
|                        | SERUM CREATINE                |
|                        | BUN/CREATINE RATIO            |
|                        | SODIUM                        |
|                        | POTASSIUM                     |
|                        | CHLORIDE                      |
|                        | CARBON DIOXIDE                |

|                               |                                 |
|-------------------------------|---------------------------------|
| <b>Lab tests - Met</b>        | CALCIUM                         |
|                               | TOTAL PROTEIN                   |
|                               | ALBUMIN                         |
|                               | GLOBULIN                        |
|                               | ALBUMUN/GLOBULIN                |
|                               | BILIRUBIN                       |
|                               | ALKALINE PHOSPHATASE            |
|                               | AST                             |
|                               | ALT                             |
|                               | CREATINE KINASE                 |
|                               |                                 |
| <b>Urinalysis</b>             | URINE GLUCOSE                   |
|                               | URINE PROTEIN                   |
|                               | URINE WBC                       |
|                               | URINE RBC                       |
|                               | URINE SQUAMOS EPLITHELIAL CELLS |
|                               | URINE BACTERIA                  |
|                               | HYALINE CAST                    |
|                               |                                 |
| <b>Lab tests - Hematology</b> | WBC COUNT                       |
|                               | RBC COUNT                       |
|                               | HEMOGLOBIN                      |
|                               | HEMATOCRIT                      |
|                               | MCV                             |
|                               | MCH                             |
|                               | MCHC                            |
|                               | RDW                             |
|                               | PLATELET COUNT                  |
|                               | ABSOLUTE NEUTROPHILS            |
|                               | ABSOLUTE LYMPHOCYTES            |
|                               | ABSOLUTE MONOCYTES              |
|                               | ABSOLUTE EOSINOPHILS            |
|                               | ABSOLUTE BASOPHILS              |
|                               | NEUTROPHIL %                    |
|                               | LYMPHOCYTE %                    |
|                               | MONOCYTE %                      |
|                               | EOSINOPHYL %                    |
|                               | BASOPHILS %                     |
|                               |                                 |
|                               | ANA +                           |
|                               | ANTI-RNP +                      |
|                               | ANTI-SM ABS +                   |
|                               | ANTI-DNA ABS +                  |
|                               | DNA ELEVATED                    |
|                               | FANA TITER                      |
|                               | FANA_PATTR                      |
|                               | SSA_RESULT                      |
|                               | SSB_RESULT                      |
|                               | SCL_RESULT                      |

## Lupus Specific lab tests

ANTI-PHOSPHO-LIPID ABS +

ANTI CARDOLIPIN ANTIBODY

ANTICARDIOLIPIN IGG LEVEL

ANTICARDIOLIPIN IGG +

ANTICARDIOLIPIN IGM LEVEL

IGM ANTICRD +

ANTICARDIOLIPIN IGA LEVEL

IGA ANTICRD+

C3 COMPLEMENT LEVEL

C3\_LOW

C4 COMPLEMENT LEVEL

C4\_LOW

ESR

ESR\_ELEVATED

C REACTIVE PROTEIN

CRP\_ELEVATED

RF LATEX TITER

RF ELISA IGM TITER

RF ELISA IGG TITER

CPK LEVEL

CPK ELEVATED

BAFF

BAFFR

TACI

BCMA

IFNG

TNFA

SCD40L

IL12P40

IL12P70

IL23

IL17A

IL17AF

IL17F

## test

**Experimental Lab**

|                                 |
|---------------------------------|
| IL11                            |
| IL21                            |
| IL22                            |
| IL33                            |
| E-SELECTIN                      |
| NGAL                            |
| IGM ANTI-U1A (196-203) TITER    |
| IGM ANTI-SME (63-70) TITER      |
| IGM ANTI-SMF (46-53) TITER      |
| IGM ANTI-U1C (90-97) TITER      |
| IGM ANTI-U1-70K (337-344) TITER |
| IGM ANTI-SMB (83-90) TITER      |
| IGM ANTI-SMG (1-8) TITER        |
| IGM ANTI-SMD3 (20-27) TITER     |
| IGM ANTI-SMF (77-84) TITER      |
| IGM ANTI-U1A (112-119) TITER    |
| IGM ANTI-SMD2 (14-21) TITER     |
| IGM ANTI-SMD1 (22-29) TITER     |
| IGM ANTI-U1A (178-185) TITER    |
| IGM ANTI-U1-70K (325-332) TITER |
| IGM ANTI-U1C (66-73) TITER      |
| ELISA ANTI-SNRNP                |
| IMMUNOBLOT ANTI-70KD            |
| IMMUNOBLOT ANTI-SM              |
| IMMUNOBLOT ANTI-U1-A            |

| <b>Definition</b>                                                                                                                                                                                        |
|----------------------------------------------------------------------------------------------------------------------------------------------------------------------------------------------------------|
| SKIN TELENGECTASIA OBSERVED                                                                                                                                                                              |
| SKIN NASAL ULCERS OBSERVED                                                                                                                                                                               |
| SKIN ORAL ULCERS OBSERVED                                                                                                                                                                                |
| RAYNAUD: A PATTERN OF COLOR CHANGES IN THE FINGERS AS FOLLOWS: PALE/WHITE FOLLOWED BY BLUE THEN RED WHEN THE HANDS ARE WARMED; COLOR CHANGES ARE USUALLY PRECEDED BY EXPOSURE TO COLD OR EMOTIONAL UPSET |
| HAND SWELLING BY HISTORY                                                                                                                                                                                 |
| HAND SWELLING OBSERVED                                                                                                                                                                                   |
| SKIN SCLERODACTYL / ACROSCLEROSIS                                                                                                                                                                        |
| SKIN DIGITAL PITTING                                                                                                                                                                                     |
| SKIN ALOPECIA-PATCHY OR GENERALIZED                                                                                                                                                                      |
| SKIN MALAR RASH- FIXED ERYTHEMA, FLAT OR RAISED, OVER THE MALAR EMINENCES, TENDING TO SPARE THE SOLABIAL FOLDS                                                                                           |
| SKIN DISCOID RASH- ERYTHEMATOUS RAISED PATCHES WITH ADHERENT KERATOTIC SCALING AND FOLLICULAR PLUGGING. ATROPHIC SCARING SEEN IN OLDER LESIONS                                                           |
| SKIN RASH OTHER BY HISTORY OR EXAM                                                                                                                                                                       |
| SKIN PHOTSENSITIVITY- SKIN RASH AS A RESULT OF UNUSUAL REACTION TO SUNLIGHT BY HISTORY OR EXAM                                                                                                           |
| SKIN CALCINOSIS OBSERVED                                                                                                                                                                                 |
| SKIN PROXIMAL SCLERODERMA / EXTEND AT or ABOVE WRIST                                                                                                                                                     |
| SKIN SICCA- XEROPHTHALMIA AND XEROSTOMIA                                                                                                                                                                 |
| MYOSITIS                                                                                                                                                                                                 |
| MYALGIA-SUBJECTIVE MUSCLE ACKING INVOLVING PROXIMAL MUSCLES                                                                                                                                              |
| ARTHRALGIA                                                                                                                                                                                               |
| ANY OBJECTIVE WEAKNESS IN THE PROXIMAL MUSCLES                                                                                                                                                           |
| A SUBJECTIVE HISTORY OF ANY PROXIMAL MUSCLE WEAKNESS                                                                                                                                                     |
| AT LEAST ONE AREA SWOLLEN IN A WRIST, MCP, OR PIP JOINT                                                                                                                                                  |
| MUSCULAR HAND SWELLING                                                                                                                                                                                   |
| SWELLING OF THE HAND BY HISTORY                                                                                                                                                                          |
| SWELLING OF THE HANDS OBSERVED                                                                                                                                                                           |
| AVASCULAR NECROSIS                                                                                                                                                                                       |
| MORNING STIFNESS LASTING AT LEAST 1 HOUR BEFORE MAXIMAL IMPROVEMENT                                                                                                                                      |
| JOINT TENDERNESS OBSERVED                                                                                                                                                                                |
| SYNOVITIS                                                                                                                                                                                                |
| HISTORY OF JOINT SWELLING                                                                                                                                                                                |
| JOINT SWELLING OBSERVED                                                                                                                                                                                  |
| SWELLING OF 3 OR MORE JOINTS (PIP, MCP, WRIST, ELBOW, KNEE, ANKLE AND MTP)                                                                                                                               |
| SYMETRIC SWELLING OBSERVED                                                                                                                                                                               |
| JOINTS PAIN                                                                                                                                                                                              |
| JOINTS DEFORMITY                                                                                                                                                                                         |
| OBSERVED RHEUMATOID NODULE- SUBCUTANEOUS NODULES OVER BONY PROMINENCES OR EXTENSOR SURFACES, OR IN JUXTAARTICULAR REGIONS                                                                                |
| ANY LYMPHADENOPATHY                                                                                                                                                                                      |
| LYMPNODES SWELLING                                                                                                                                                                                       |
| NECK LYMPNODE SWELLIN                                                                                                                                                                                    |
| AXILA LYMPNODE SWELLIN                                                                                                                                                                                   |

|                                                                                                                                   |
|-----------------------------------------------------------------------------------------------------------------------------------|
| GROIN LYMPHNODE SWELLIN                                                                                                           |
| GASTRIC REFLUX AS DIAGNOSED BY PATIENT SYMPTOMS OF HEARTBURN, ACID REFLUX OR CHEST PAIN AND RADIOGRAPHIC STUDIES AND/OR ENDOSCOPY |
| ANEMIA                                                                                                                            |
| HEMOLYTIC ANEMIA                                                                                                                  |
| LEUKOPENIA                                                                                                                        |
| LYMPHOPENIA, Total lymphocyte count < 1500/mm                                                                                     |
| THROMBOCYTOPENIA                                                                                                                  |
| THROMBOSIS                                                                                                                        |
| CONVINCING HISTORY OF PLEURITIC PAIN OR RUBBING HEARD BY A PHYSICIAN OR EVIDENCE OF PLEURAL EFFUSION                              |
| PERICARDITIS: DOCUMENTED BY ECG OR RUB OR EVIDENCE OF PERICARDIAL EFFUSION                                                        |
| PLEURITIS and/or PERICARDITIS: either or both of two above described                                                              |
| VENOUS CLOT                                                                                                                       |
| ARTERIAL CLOT                                                                                                                     |
| ANY CLOT                                                                                                                          |
| MYOCARDIO INFARCTION                                                                                                              |
| VALVULAR HEART DISEASE                                                                                                            |
| AORTIC, MITRAL TRICUSPID, PULMONIC                                                                                                |
| BASED ON THE VALVULAR DISEASE TYPE                                                                                                |
| PULMONARY HYPERTENSION $\geq 40$ mmHg RVSP                                                                                        |
| PULMONARY VASCULAR DISEASE BY BIOPSY OR AUTOPSY                                                                                   |
| PULMONARY FIBROSIS BASED ON CHEST XRAY OR CT SCAN                                                                                 |
| LUNG DISEASE DEFINED BY pHTN (Clin-P1) + AND/OR PULMONARY FIBROSIS (Clin-P3)                                                      |
| RENAL DISEASE DEFINED BY ACRRENAL + AND/OR RENAL BIOPSY                                                                           |
| RENAL CELLULAR CAST- RED, HEMOGLOBIN, GRANULAR, TUBULAR, OR MIXED                                                                 |
| RENAL PROTEINURIA- PERSISTENT > 0.5 GRAMS/24HRS OR > 3+                                                                           |
| RENAL HEMATURIA- > 5 RBC PER HIGH POWERED FIELD                                                                                   |
| REPORTED RENAL CLOT                                                                                                               |
| REPORTED RENAL ARTERY STENOSIS                                                                                                    |
| SEIZURE IN THE ABSENCE OF OFFENDING DRUGS OR KNOWN METABOLIC DERANGEMENTS                                                         |
| PSYCHOSIS IN THE ABSENCE OF OFFENDING DRUGS OR KNOWN METABOLIC DERANGEMENTS                                                       |
| ANY NEUROPATHY                                                                                                                    |
| NEUROPSYCHIATRIC                                                                                                                  |
| STROKE                                                                                                                            |
| CHOREA                                                                                                                            |
| GLUCOSE NORMAL RANGE: 65-99 MG/DL                                                                                                 |
| UREA NITROGEN (BUN) NORMAL RANGE: 7-25 MG/ML                                                                                      |
| CREATINE NORMAL RANGE: 0.5-1.4 MG/DL                                                                                              |
| SERUM CREATINE                                                                                                                    |
| BUN/CREATINE RATIO NORMAL RANGE: 6-25 CALC                                                                                        |
| SODIUM NORMAL RANGE: 135-146 MMOL/L                                                                                               |
| POTASIUUM NORMAL RANGE: 3.5-5.3 MMOL/L                                                                                            |
| CHLORIDE NORMAL RANGE: 98-110 MMOL/L                                                                                              |
| CARBON DIOXIDE NORMAL RANGE: 21-33 MMOL/L                                                                                         |

|                                                                                                |
|------------------------------------------------------------------------------------------------|
| CALCIUM NORMAL RANGE: 8.5-10.4 MG/DL                                                           |
| TOTAL PROTEIN NORMAL RANGE: 6-8.3 G/DL                                                         |
| ALBUMIN NORMAL RANGE: 3.7-5.1 G/DL                                                             |
| GLOBULIN NORMAL RANGE: 2.2-4.2 G/DL                                                            |
| ALBUMUN/GLOBULIN NORMAL RANGE: 0.8-2 CALC                                                      |
| BILIRUBIN NORMAL RANGE: 0.2-1.5 MG/DL                                                          |
| ALKALINE PHOSPHATASE NORMAL RANGE: 20-125 MG/DL                                                |
| AST NORMAL RANGE: 3-35 MG/DL                                                                   |
| ALT NORMAL RANGE: 3-40 U/L                                                                     |
| CREATINE KINASE NORMAL RANGE: 0-165 U/L                                                        |
| URINE GLUCOSE NORMAL RANGE: 0                                                                  |
| URINEPROTEIN NORMAL RANGE: 0                                                                   |
| URINE WBC NORMAL RANGE: </= 5                                                                  |
| URINE RBC NORMAL RANGE: </= 5                                                                  |
| URINE SQUAMOS EPLITHELIAL CELLS NORMAL RANGE: </= 5                                            |
| URINE BACTERIA NORMAL RANGE: 0                                                                 |
| HYALINE CAST NORMAL RANGE: 0                                                                   |
| WBC COUNT NORMAL RANGE: 3.8-10.8 THOUS/MCL                                                     |
| RBC COUNT NORMAL RANGE: 4.20-5.80 MILL/MCL                                                     |
| HEMOGLOBIN NORMAL RANGE: 13.2-17.1 G/DL                                                        |
| HEMATOCRIT NORMAL RANGE: 38.5-50%                                                              |
| MCV NORMAL RANGE: 80-100 FL                                                                    |
| MCH NORMAL RANGE: 27-33 PG                                                                     |
| MCHC NORMAL RANGE: 32-36 G/DL                                                                  |
| RDW NORMAL RANGE: 11-15%                                                                       |
| PLATELET COUNT NORMAL RANGE: 140-400 THOUS/MCL                                                 |
| ABSOLUTE NEUTROPHILS NORMAL RANGE: 1500-7800 CELLS/MCL                                         |
| ABSOLUTE LYMPHOCYTES NORMAL RANGE: 850-3900 CELLS/MCL                                          |
| ABSOLUTE MONOCYTES NORMAL RANGE: 200-950 CELLS/MCL                                             |
| ABSOLUTE EOSINOPHILS NORMAL RANGE: 15-500 CELLS/MCL                                            |
| ABSOLUTE BASOPHILS NORMAL RANGE: 0-200 CELLS/MHC                                               |
| NEUTROPHIL % NORMAL RANGE: 35-80%                                                              |
| LYMPHOCYTE % NORMAL RANGE: 18-44%                                                              |
| MONOCYTE % NORMAL RANGE: 0-10%                                                                 |
| EOSINOPHYL % NORMAL RANGE: 0-3%                                                                |
| BASOPHILS % NORMAL RANGE: 0-1%                                                                 |
| ANA                                                                                            |
| ANTI-RNP AT HEMAGGLUTINATION TITER > 1:1600                                                    |
| SM NORMAL RANGE: 0-20                                                                          |
| DSDNA TITER NORMAL RANGE: 5-9 IU/ML                                                            |
| ELEVATED DNA IF ≥ 10 IU/ML                                                                     |
| FANA TITER NORMAL RANGE: <320                                                                  |
| FANA PATTERN. HOMO , SPECKLED NUCLEOLAR, HOMO/SPECKLED, MIXED ,<br>SPECKLED/MIXED, NO-SPECIFIC |
| SSA NORMAL RANGE: < 20 EU/ML                                                                   |
| SSB NORMAL RANGE: < 20 EU/ML                                                                   |
| SCL NORMAL RANGE: < 20 EU/ML                                                                   |



|                                                        |
|--------------------------------------------------------|
| ANTI-PHOSPHOLIPID ABS + IF > 10 GPL U/ML               |
| ANTI CARDOLIPIN ANTIBODY IF > 10 GPL U/ML              |
| ANTICARDIOLIPIN IGG NORMAL RANGER: < 10 GPL U/ML       |
| ANTICARDIOLIPIN IGG + IF > 10 GPL U/ML                 |
| ANTICARDIOLIPIN IGM NORMAL RANGER: < 10 GPL U/ML       |
| IGM ANTICRD + IF > 10 GPL U/ML                         |
| ANTICARDIOLIPIN IGA NORMAL RANGER: < 10 GPL U/ML       |
| IGA ANTICRD+ IF > 10 GPL U/ML                          |
| C3 COMPLEMENT NORMAL RANGE: 90 – 180 MG/DL             |
| C3_LOW IF < 90 MG/DL                                   |
| C4 COMPLEMENT NORMAL RANGE: 16 – 47 MG/DL              |
| C4_LOW IF < 16                                         |
| ESR NOMAL RAMNGE: < 10 MG/DL                           |
| ESR_ELEVATED IF >10 MG/DL                              |
| C REACTIVE PROTEIN NOMAL RANGE: 1.0 MG/DL              |
| CRP_ELEVATED FI . 1.0 MG/DL                            |
| RF LATEX TITER NORMAL RANGE: 14 IU/ML                  |
| RF ELISA IGM TITER NORMAL RANGE: < 20 IU/ML            |
| RF ELISA IGG TITER NORMAL RANGE: < 20 IU/ML            |
| CPK NORMAL RANGE: < 165 U/L                            |
| CPKELEAVTED: > 165 U/L                                 |
| BAFF NORMAL CYTOKINE LEVEL < 1.19 NG/ML                |
| (BASED ON HEALTHY GROUP AVERAGE + SD OF HEALTHY GROUP) |
| BAFFR NORMAL CYTOKINE LEVEL < 0.09 NG/ML               |
| (BASED ON HEALTHY GROUP AVERAGE + SD OF HEALTHY GROUP) |
| TACI NORMAL CYTOKINE LEVEL < 0.02 NG/ML                |
| (BASED ON HEALTHY GROUP AVERAGE + SD OF HEALTHY GROUP) |
| BCMA NORMAL CYTOKINE LEVEL < 1.64 NG/ML                |
| (BASED ON HEALTHY GROUP AVERAGE + SD OF HEALTHY GROUP) |
| IFNG NORMAL CYTOKINE LEVEL < 13.13 PG/ML               |
| (BASED ON HEALTHY GROUP AVERAGE + SD OF HEALTHY GROUP) |
| TNFA NORMAL CYTOKINE LEVEL < 7.58 PG/ML                |
| (BASED ON HEALTHY GROUP AVERAGE + SD OF HEALTHY GROUP) |
| SCD40L NORMAL CYTOKINE LEVEL < 1959.30 PG/ML           |
| (BASED ON HEALTHY GROUP AVERAGE + SD OF HEALTHY GROUP) |
| IL12P40 NORMAL CYTOKINE LEVEL < 61.68 PG/ML            |
| (BASED ON HEALTHY GROUP AVERAGE + SD OF HEALTHY GROUP) |
| IL12P70 NORMAL CYTOKINE LEVEL < 18.77 PG/ML            |
| (BASED ON HEALTHY GROUP AVERAGE + SD OF HEALTHY GROUP) |
| IL23 NORMAL CYTOKINE LEVEL < 348.34 PG/ML              |
| (BASED ON HEALTHY GROUP AVERAGE + SD OF HEALTHY GROUP) |
| IL17A NORMAL CYTOKINE LEVEL < 3.88 PG/ML               |
| (BASED ON HEALTHY GROUP AVERAGE + SD OF HEALTHY GROUP) |
| IL17AF NORMAL CYTOKINE LEVEL < 19.40 PG/ML             |
| (BASED ON HEALTHY GROUP AVERAGE + SD OF HEALTHY GROUP) |
| IL17F NORMAL CYTOKINE LEVEL < 38.00 PG/ML              |

|                                                        |
|--------------------------------------------------------|
| (BASED ON HEALTHY GROUP AVERAGE + SD OF HEALTHY GROUP) |
| IL21 NORMAL CYTOKINE LEVEL < 13.5 PG/ML                |
| (BASED ON HEALTHY GROUP AVERAGE + SD OF HEALTHY GROUP) |
| IL22 NORMAL CYTOKINE LEVEL < 31 PG/ML                  |
| (BASED ON HEALTHY GROUP AVERAGE + SD OF HEALTHY GROUP) |
| IL33 NORMAL CYTOKINE LEVEL < 12.3 PG/ML                |
| (BASED ON HEALTHY GROUP AVERAGE + SD OF HEALTHY GROUP) |
| ESELECTIN NORMAL CYTOKINE LEVEL < 23.63 NG/ML          |
| (BASED ON HEALTHY GROUP AVERAGE + SD OF HEALTHY GROUP) |
| NGAL NORMAL CYTOKINE LEVEL < 79.10 NG/ML               |
| (BASED ON HEALTHY GROUP AVERAGE + SD OF HEALTHY GROUP) |
| P1-IGM AVERAGE NORMAL RANGE: 0-100                     |
| P2-IGM AVERAGE NORMAL RANGE: 0-100                     |
| P3-IGM AVERAGE NORMAL RANGE: 0-100                     |
| P4-IGM AVERAGE NORMAL RANGE: 0-100                     |
| P5-IGM AVERAGE NORMAL RANGE: 0-100                     |
| P6-IGM AVERAGE NORMAL RANGE: 0-100                     |
| P7-IGM AVERAGE NORMAL RANGE: 0-100                     |
| P8-IGM AVERAGE NORMAL RANGE: 0-100                     |
| P9-IGM AVERAGE NORMAL RANGE: 0-100                     |
| P10-IGM AVERAGE NORMAL RANGE: 0-100                    |
| P11-IGM AVERAGE NORMAL RANGE: 0-100                    |
| P12-IGM AVERAGE NORMAL RANGE: 0-100                    |
| P13-IGM AVERAGE NORMAL RANGE: 0-100                    |
| P14-IGM AVERAGE NORMAL RANGE: 0-100                    |
| P15-IGM AVERAGE NORMAL RANGE: 0-100                    |
| BASED ON HEALTHY GROUP AVERAGE + SD OF HEALTHY GROUP   |
| BASED ON HEALTHY GROUP AVERAGE + SD OF HEALTHY GROUP   |
| BASED ON HEALTHY GROUP AVERAGE + SD OF HEALTHY GROUP   |
| BASED ON HEALTHY GROUP AVERAGE + SD OF HEALTHY GROUP   |

| Tissue                                                                                                         |                     | Variable                  |
|----------------------------------------------------------------------------------------------------------------|---------------------|---------------------------|
| C<br>L<br>I<br>N<br>I<br>C<br>A<br>L<br><br>M<br>A<br>N<br>I<br>F<br>E<br>S<br>T<br>A<br>T<br>I<br>O<br>N<br>S | SKIN                | Telangiectasia            |
|                                                                                                                |                     | Nasal ulcers              |
|                                                                                                                |                     | Oral ulcers               |
|                                                                                                                |                     | Hist hand swelling        |
|                                                                                                                |                     | Obs hand swelling         |
|                                                                                                                |                     | Sclerodactyly             |
|                                                                                                                |                     | Pitting                   |
|                                                                                                                |                     | Alopecia                  |
|                                                                                                                |                     | Rash                      |
|                                                                                                                |                     | Photosensitivity          |
|                                                                                                                |                     | Discoid rash              |
|                                                                                                                |                     | Raynaud's                 |
|                                                                                                                |                     | Calcinosis                |
|                                                                                                                |                     | Prox sclerodema           |
|                                                                                                                |                     | SICCA                     |
|                                                                                                                | MUSCLE              | Myositis                  |
|                                                                                                                |                     | Myalgia                   |
|                                                                                                                |                     | Arthralgia                |
|                                                                                                                |                     | Hist prox muscle weakness |
|                                                                                                                |                     | Obs prox muscle weakness  |
| Hist hand swelling                                                                                             |                     |                           |
| Obs hand swelling                                                                                              |                     |                           |
| Low extremety swelling                                                                                         |                     |                           |
| JOINTS                                                                                                         | Facial swelling     |                           |
|                                                                                                                | Morning stiff       |                           |
|                                                                                                                | Tender              |                           |
|                                                                                                                | Synovitys           |                           |
|                                                                                                                | Hist swelling       |                           |
|                                                                                                                | Obs swelling        |                           |
|                                                                                                                | Swelling (>3)       |                           |
|                                                                                                                | Symmetric sweeling  |                           |
|                                                                                                                | Pain                |                           |
| Deformity                                                                                                      |                     |                           |
| LYMPH NODES                                                                                                    | Any lymphadenopathy |                           |
|                                                                                                                | Swelling            |                           |
|                                                                                                                | Neck swelling       |                           |
|                                                                                                                | Axila swelling      |                           |
|                                                                                                                | Groin swelling      |                           |
|                                                                                                                | Rheumatoid nodule   |                           |
| GASTRO                                                                                                         | Gastric reflux      |                           |
| DOD                                                                                                            | Anemia              |                           |
|                                                                                                                | Hemolytic anemia    |                           |
|                                                                                                                | Leukopenia          |                           |

|                                                |                      |                             |
|------------------------------------------------|----------------------|-----------------------------|
| L<br>A<br>B<br>O<br>R<br>A<br>T<br>O<br>R<br>Y | BLC                  | Lymphopenia                 |
|                                                |                      | Thrombopenia                |
|                                                |                      | Thrombosis                  |
|                                                | HEART                | Pericarditis                |
|                                                |                      | Pleuritis                   |
|                                                |                      | Pericarditis/pleuritis      |
|                                                |                      | Any clot                    |
|                                                |                      | Venous clot                 |
|                                                |                      | Valvular disease            |
|                                                |                      | Avascular necrosis          |
|                                                |                      | Myocardial infarction       |
|                                                |                      | Stroke                      |
|                                                |                      | LUNG                        |
|                                                | Vascular lesions     |                             |
|                                                | Fibrosis             |                             |
|                                                | Lung disease         |                             |
|                                                | KIDNEY               | Proteinuria                 |
|                                                |                      | Hematuria                   |
|                                                |                      | Clot                        |
|                                                |                      | Arterial stenosis           |
|                                                |                      | Cell cast                   |
|                                                |                      | Renal disease               |
|                                                | NERVOUS              | Neuropathy                  |
|                                                |                      | Psychosis                   |
|                                                |                      | Chorea                      |
|                                                | URINALYSIS           | Glucose +                   |
|                                                |                      | Protein +                   |
|                                                |                      | WBC +                       |
|                                                |                      | RBC +                       |
|                                                |                      | squamos eplithelial cells + |
|                                                |                      | Hyaline cast +              |
|                                                | ADDITIONAL FOR LUPUS | Sm level                    |
|                                                |                      | Sm +                        |
| dsDNA titer                                    |                      |                             |
| DNA +                                          |                      |                             |
| DNA elevated                                   |                      |                             |
| FANA titer                                     |                      |                             |
| FANA +                                         |                      |                             |
| SSA +                                          |                      |                             |
| C3 level                                       |                      |                             |
| C3 low                                         |                      |                             |
| C4 level                                       |                      |                             |
| C4 low                                         |                      |                             |
| ESR                                            |                      |                             |

|                  |              |                         |
|------------------|--------------|-------------------------|
| E<br>S<br>T<br>S | TRAD         | ESR elevated            |
|                  |              | CRP                     |
|                  |              | CRP elevated            |
|                  |              | IgM-RF ELISA titer      |
|                  |              | IgM-RF +                |
|                  |              | IgG-RF ELISA titer      |
|                  |              | IgG-RF +                |
|                  |              | CPK level               |
|                  |              | CPK elevated            |
|                  |              | IL17A                   |
|                  | EXPERIMENTAL | IgM-U1A ELISA (112-119) |
|                  |              | IgM-U1A ELISA (196-203) |
|                  |              | IgM-SmD2 ELISA (14-21)  |
|                  |              | IgM-SmD2 ELISA (14-21)  |

### Unclear SLE vs MCTD patients: Decision tree 1

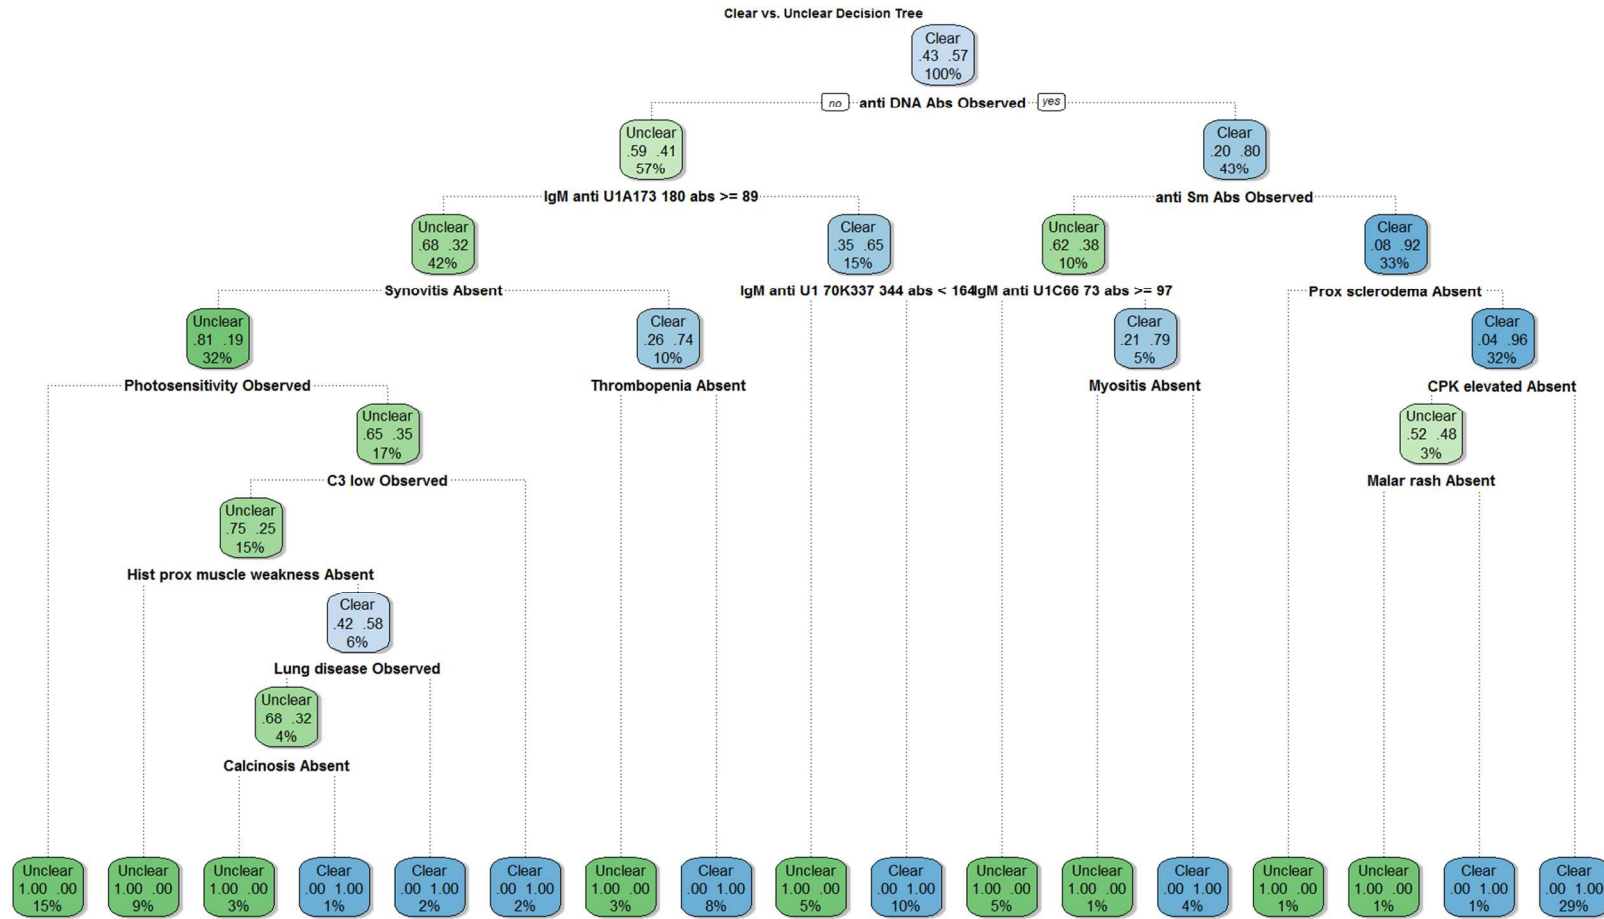

|             | Training | Test   | Validation |
|-------------|----------|--------|------------|
| Accuracy    | 0.9125   | 0.9231 | 0.9630     |
| Sensitivity | 0.5890   | 0.5833 | 0.6154     |
| Specificity | 0.5000   | 0.5000 | 0.5000     |

### Unclear SLE vs MCTD patients: Decision tree 2

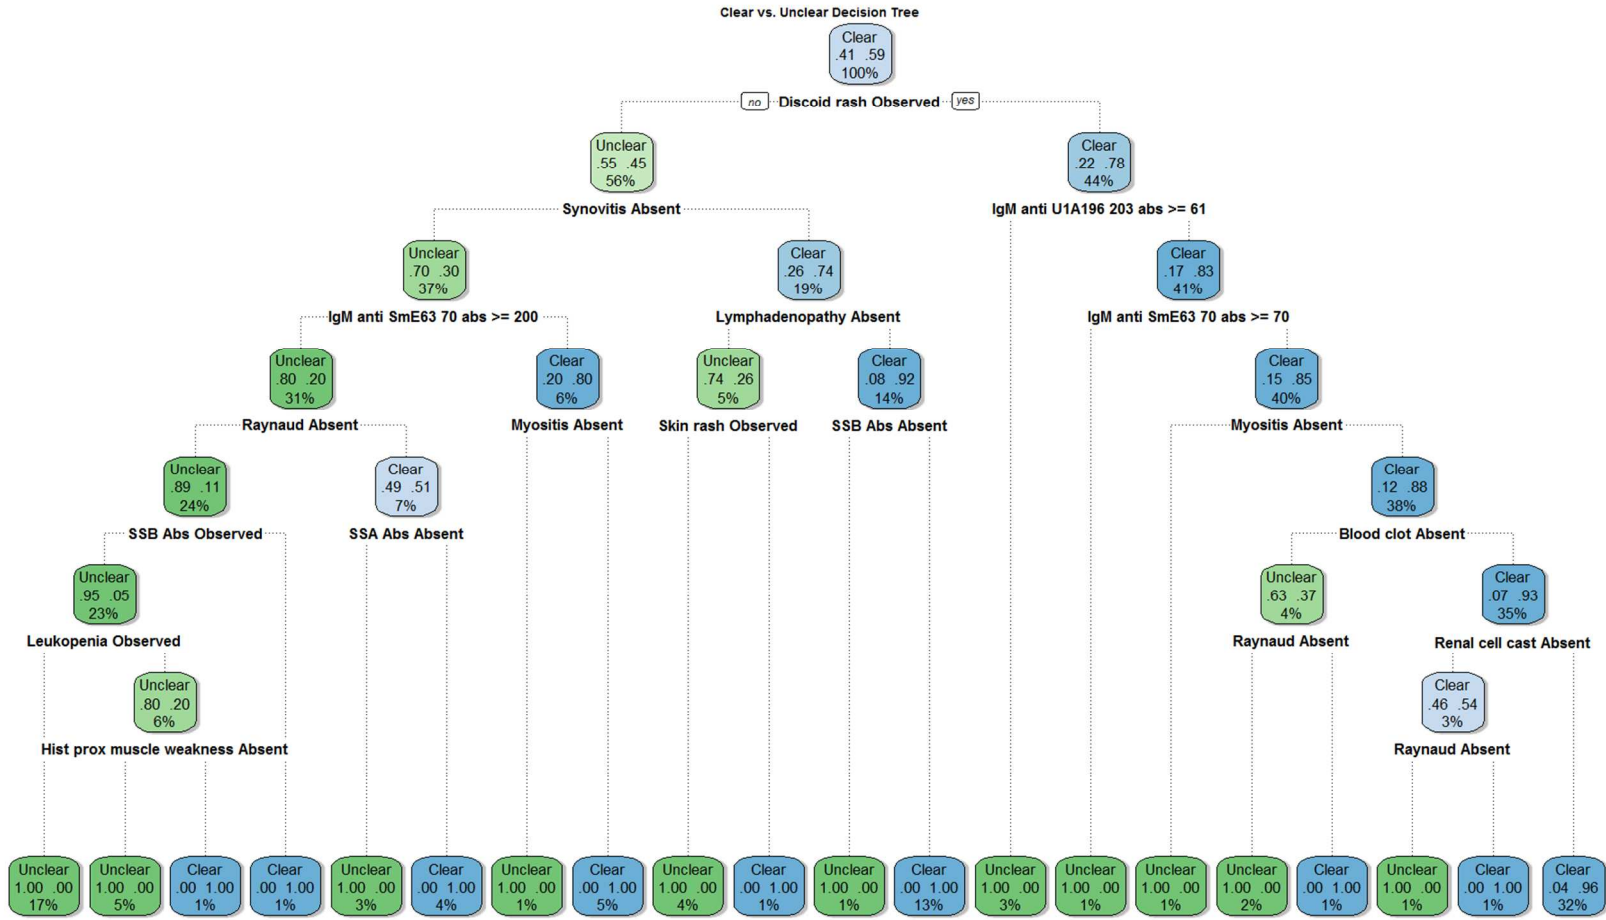

|             | Training | Test   | Validation |
|-------------|----------|--------|------------|
| Accuracy    | 0.8875   | 0.9231 | 0.8889     |
| Sensitivity | 0.6197   | 0.5833 | 0.5833     |
| Specificity | 0.5000   | 0.5000 | 0.5000     |

### Unclear SLE vs MCTD patients: Decision tree 3

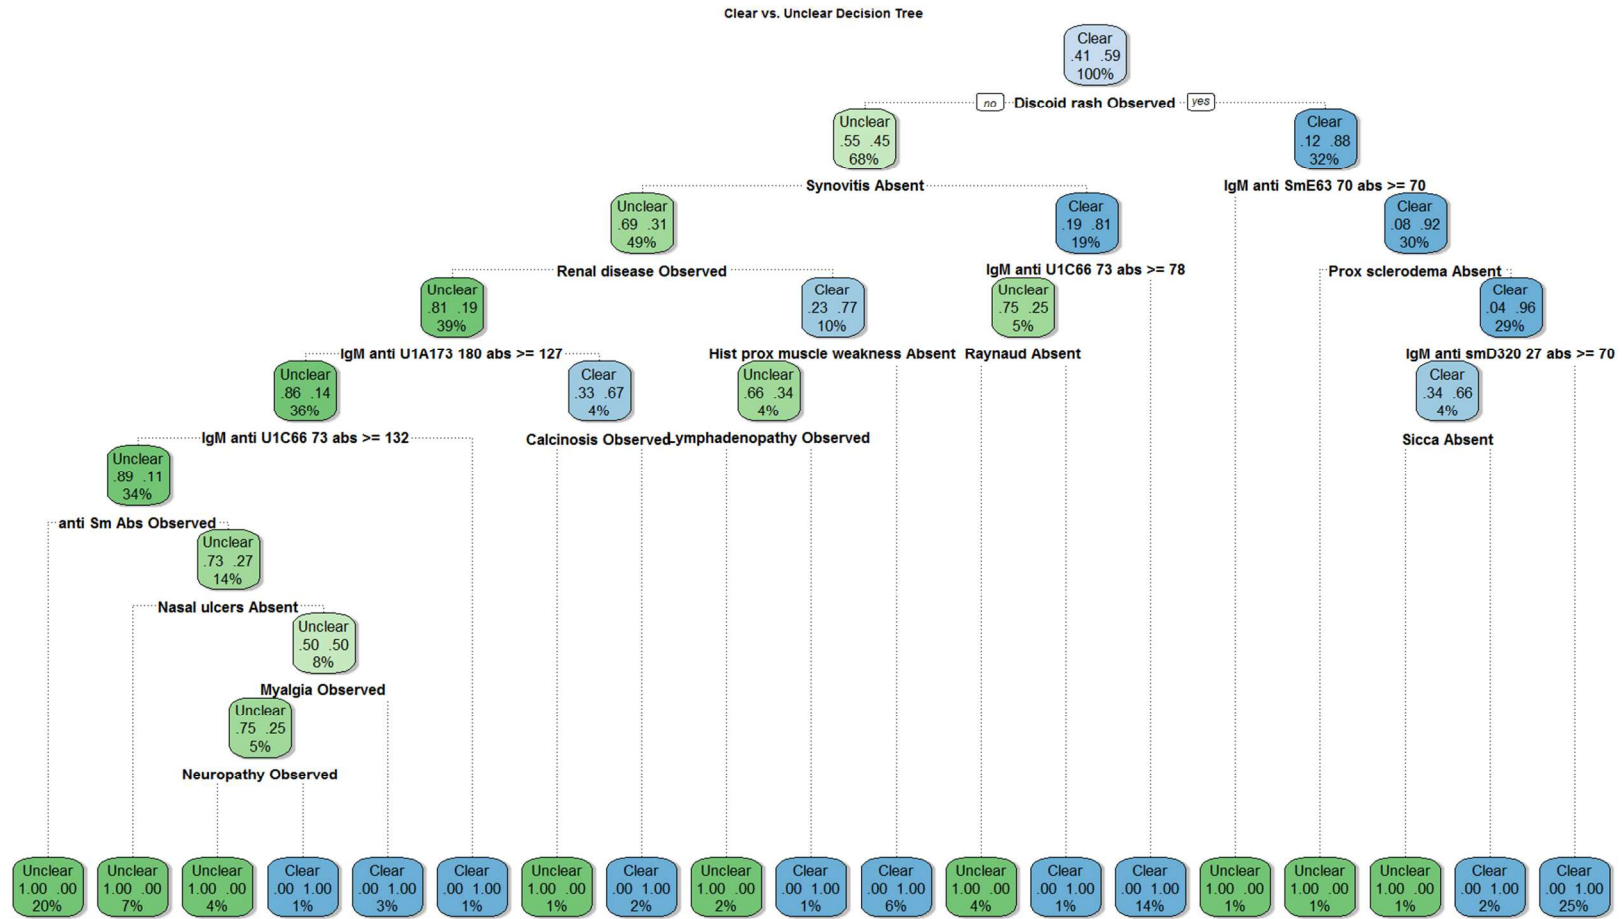

|                    | Training | Test   | Validation |
|--------------------|----------|--------|------------|
| <b>Accuracy</b>    | 0.9375   | 0.8846 | 0.9259     |
| <b>Sensitivity</b> | 0.6000   | 0.6087 | 0.6000     |
| <b>Specificity</b> | 0.5000   | 0.5000 | 0.5000     |
